# Supplementary material
Source: HighWire-hosted journal article supplement (https://gh.bmj.com/content/8/5/e011882)
Supplement: inline-supplementary-material-1 [file inline-supplementary-material-1.pdf]

## Supplementary file: Ethical reporting of research on violence against women and children: A review of current practice and recommendations for future guidelines

Figure A1. Flow diagram of study selection

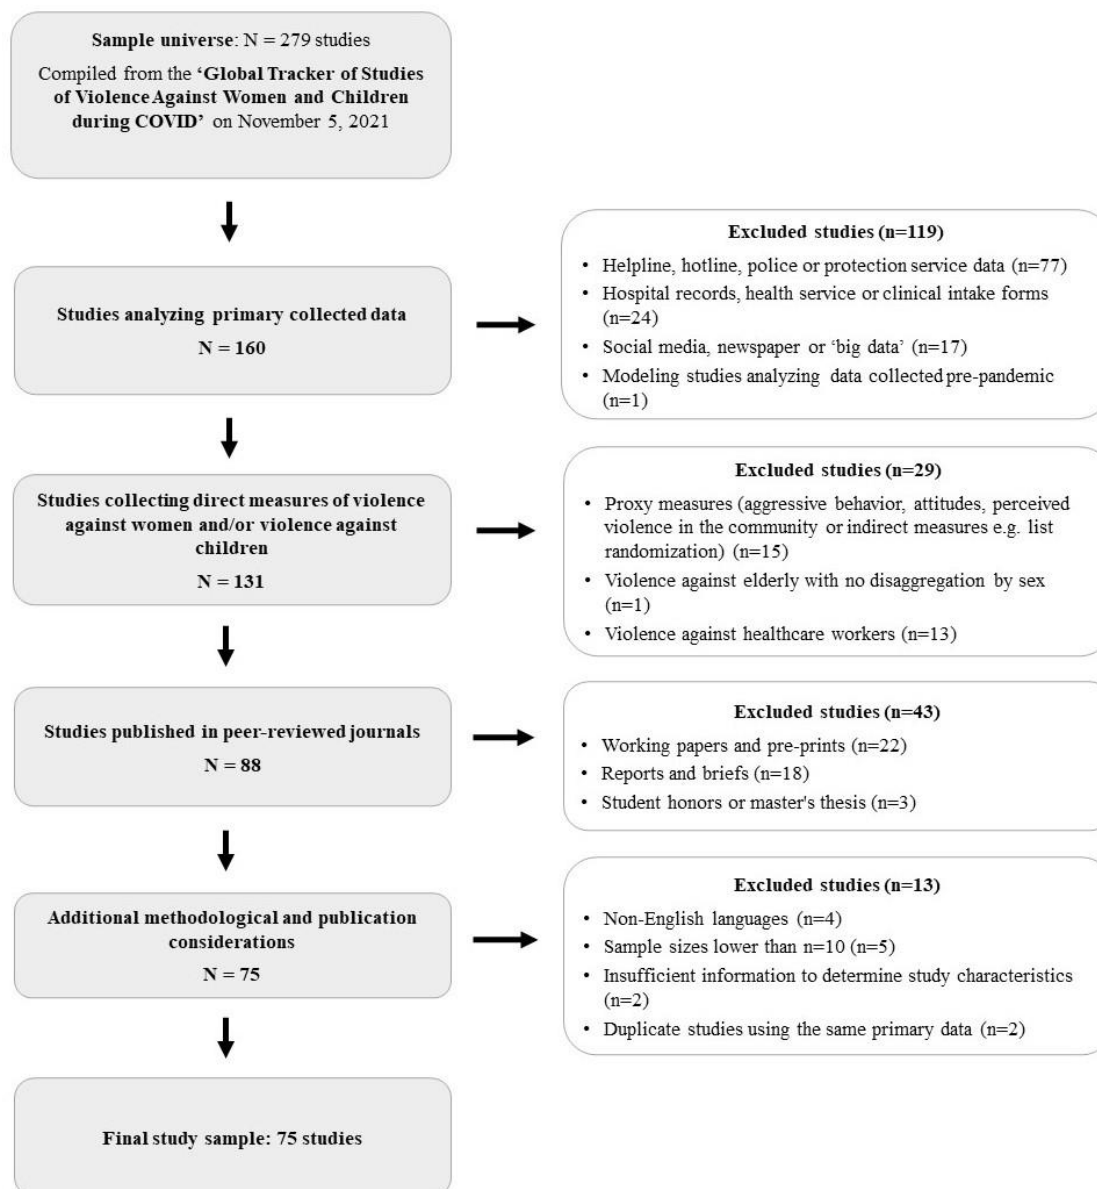

Notes: The tracker is an open access database of analysis studies compiled through weekly searches of google scholar ("COVID-19" AND "violence", hits = 3,250), as well as studies found via multiple listservs, newsletters and social media posts. Parameters for inclusion are: 1) Violence against women and/or violence against children studies (excludes studies only analyzing violence against men), 2) studies analyzing psychological/emotional, physical and sexual violence experienced in and outside the home, including attitudes and proxy measures (exclude broader forms of gender-based violence, e.g. child marriage, female genital mutilation, child labor etc.) and self-harm (suicide, self-injury) as well as surveys and data from service provider, 3) No restrictions on study methodology, location or type of publication.

**Table A1. Included study characteristics**

| No | Study                           | Location      | Methods | Sample                                    | Mode of data collection | Type of measure | Report | Violence measure(s) / themes explored (recall period)                                                                                      |
|----|---------------------------------|---------------|---------|-------------------------------------------|-------------------------|-----------------|--------|--------------------------------------------------------------------------------------------------------------------------------------------|
| 1  | AboKresha et al. (2021)         | Egypt         | Quant   | 1,118 parents of children <18 years       | Web-based               | VAC             | Proxy  | Child abuse screening tool (ICAST-P) (last 2 weeks)                                                                                        |
| 2  | Abrahams et al. (2021)          | South Africa  | Quant   | 885 women aged $\geq 15$ years            | Telephone               | VAW             | Self   | Composite Abuse Scale, short form (last 12 months)                                                                                         |
| 3  | Abuhammad (2020)                | Jordan        | Quant   | 687 women aged 18-55 years                | Web-based               | VAW             | Self   | 24 questions, scale NR (during COVID-19)                                                                                                   |
| 4  | Adibelli et al. (2021)          | Turkey        | Quant   | 332 women aged $\geq 18$ years            | Face-to-face; Web-based | VAW             | Self   | Domestic violence against women scale (recall NR)                                                                                          |
| 5  | Ajayi et al. (2021)             | Nigeria       | Qual    | 30 men & women in 3 FGDs aged 30-60 years | Face-to-face            | VAW             | Proxy  | IPV (during lockdown)                                                                                                                      |
| 6  | Alharbi et al. (2021)           | Saudi Arabia  | Quant   | 2,254 women aged $\geq 18$ years          | Web-based               | VAW             | Self   | WHO multi-country study IPV tool (before & after COVID-19)                                                                                 |
| 7  | Aolymat (2021)                  | Jordan        | Quant   | 200 women aged $\geq 18$ years            | Web-based               | VAW             | Self   | Domestic abuse, scale NR (during COVID-19)                                                                                                 |
| 8  | Arenas-Arroyo et al. (2021)     | Spain         | Quant   | 8,951 women aged 18-60 years              | Web-based               | VAW             | Self   | IPV, scale NR (before & during COVID-19)                                                                                                   |
| 9  | Augusti et al. (2021)           | Norway        | Quant   | 3,545 adolescents age 13-16               | Web-based               | VAC             | Self   | Modified Parent-Child Conflict Tactics Scale; witnessing domestic violence; sexual abuse; online sexual abuse, scales NR (during COVID-19) |
| 10 | Behera et al. (2021)            | India         | Mixed   | 45 women aged 21-61 years                 | Telephone               | VAW             | Self   | Domestic violence, scale NR (recall NR)                                                                                                    |
| 11 | Boxall et al. (2020)            | Australia     | Quant   | 15,000 women aged $\geq 18$ years         | Web-based               | VAW             | Self   | Physical &/or sexual IPV; Stalking; Psychological Maltreatment of Women Inventory–Short Form (last 3 months)                               |
| 12 | Cannon et al. (2021)            | United States | Quant   | 374 men & women > 18 years                | Web-based               | VAW             | Self   | IPV, scale NR (last 10 weeks, during COVID-19)                                                                                             |
| 13 | Cano-Lozano et al. (2021)       | Spain         | Quant   | 2,245 youth aged 18-25 years              | Web-based               | VAW             | Proxy  | Child-to-parent Violence Questionnaire, youth version; The Violence Exposure Scale (domestic violence sub-scale) (during confinement)      |
| 14 | Chatzifotiou & Andreadou (2021) | Greece        | Qual    | 15 female survivors aged 30-50 years      | Face-to-face            | VAW             | Self   | IPV (during the pandemic)                                                                                                                  |
| 15 | Chung et al. (2020)             | Singapore     | Quant   | 258 parents of children $\leq 12$ years   | Web-based               | VAC             | Proxy  | Harsh parenting (during lockdown)                                                                                                          |

| No | Study                      | Location      | Methods | Sample                                   | Mode of data collection | Type of measure | Report         | Violence measure(s) / themes explored (recall period)                                                         |
|----|----------------------------|---------------|---------|------------------------------------------|-------------------------|-----------------|----------------|---------------------------------------------------------------------------------------------------------------|
| 16 | Das et al. (2021)          | India         | Qual    | 50 women aged 15-49 years                | Telephone;<br>Web-based | VAW             | Self           | Domestic violence (lifetime & during lockdown)                                                                |
| 17 | Das et al. (2021b)         | India         | Quant   | 159 women aged 15-49                     | Face-to-face            | VAW             | Self           | WHO multi-country survey IPV tool (last 2 months)                                                             |
| 18 | Dekel & Abrahams (2021)    | South Africa  | Qual    | 16 female survivors aged 20-52 years     | Telephone               | VAW             | Self           | IPV (during COVID-19 lockdowns)                                                                               |
| 19 | Diaz et al. (2021)         | United States | Quant   | 417 female youth aged 15-28 years        | Web-based               | VAW             | Self           | Adverse Childhood Experiences scales, sexual abuse & IPV (during COVID-19)                                    |
| 20 | Ebert & Steinert (2021)    | Germany       | Quant   | 3,818 women aged 18-65 years             | Web-based               | VAC;<br>VAW     | Proxy;<br>Self | Modified WHO multi-country study IPV tool, short form; Corporal punishment of children, scale NR (last month) |
| 21 | Egger et al. (2021)        | Kenya         | Quant   | 8,572 households (female respondents)    | Telephone               | VAC;<br>VAW     | Proxy;<br>Self | Emotional, physical & sexual IPV; Child physical punishment, scale NR (last 2 weeks)                          |
| 22 | El-Nimr et al. (2021)      | Cross-country | Quant   | 490 women $\geq$ 18 years                | Web-based               | VAW             | Self           | Modified WHO IPV instrument (before & after lockdown)                                                         |
| 23 | Every-Palmer et al. (2020) | New Zealand   | Quant   | 2,426 men & women aged 18-90 years       | Web-based               | VAW             | Self           | Physical assault; Harassment & threatening behavior; sexual assault, scales NR (during lockdown)              |
| 24 | Gebrewahd et al. (2021)    | Ethiopia      | Quant   | 682 women aged $\geq$ 18 years           | Face-to-face            | VAW             | Self           | WHO multi-country survey IPV tool (during COVID-19)                                                           |
| 25 | Ghimire et al. (2020)      | Nepal         | Quant   | 556 men & women aged $\geq$ 18 years     | Web-based               | VAW             | Proxy;<br>Self | IPV; interpersonal violence, scales NR (during lockdown)                                                      |
| 26 | Gibbons et al. (2021)      | Argentina     | Quant   | 1,502 women $\geq$ 18 years              | Web-based               | VAW             | Self           | WHO multi-country survey IPV tool (1 year prior & 2 months during quarantines)                                |
| 27 | Gresham et al. (2021)      | United States | Quant   | 1,803 men & women                        | Web-based               | VAW             | Self           | Experience with Battering Scale; Abusive Behavior Inventory (during COVID-19)                                 |
| 28 | Gulesci et al. (2021)      | Bolivia       | Quant   | 511 male & female youth aged 16-19 years | Telephone               | VAW             | Self           | Gender-based violence, scale NR (last 3 months)                                                               |
| 29 | Hamadani et al. (2021)     | Bangladesh    | Quant   | 2,174 women average age 24 years         | Telephone               | VAW             | Self           | WHO multi-country survey IPV tool (since March 2020)                                                          |
| 30 | Haq et al. (2020)          | Pakistan      | Quant   | 389 women                                | Web-based               | VAW             | Self           | Emotional, verbal & physical violence, scale NR (during lockdown)                                             |

| No | Study                     | Location      | Methods | Sample                                                                                          | Mode of data collection | Type of measure | Report      | Violence measure(s) / themes explored (recall period)                                   |
|----|---------------------------|---------------|---------|-------------------------------------------------------------------------------------------------|-------------------------|-----------------|-------------|-----------------------------------------------------------------------------------------|
| 31 | Hastuti et al. (2021)     | Indonesia     | Qual    | 20 female survivors in 12 IDIs & 1 FGD                                                          | Face-to-face            | VAW             | Self        | Violence against women (during COVID-19)                                                |
| 32 | Huq et al. (2021)         | India         | Qual    | 586 female survivors primarily aged 20-49 years                                                 | Telephone               | VAW             | Self        | Violence against women (during COVID-19)                                                |
| 33 | Ibitoye & Ajagunna (2021) | Nigeria       | Qual    | 45 women aged 15-49 years                                                                       | Face-to-face            | VAW             | Self        | Sexual violence & abuse (during COVID-19)                                               |
| 34 | Jetelina et al. (2020)    | United States | Quant   | 1,759 men & women aged $\geq$ 18 years                                                          | Web-based               | VAW             | Self        | Extended Hurt, Insulted, Threatened & Screen (E-HITS) construct (change since COVID-19) |
| 35 | Jung et al. (2020)        | Germany       | Mixed   | 3,545 men & women average age 40 years                                                          | Web-based               | VAW             | Self        | Interpersonal violence, scale NR (last 4 weeks)                                         |
| 36 | Karp et al. (2021)        | Kenya         | Mixed   | 756 female adolescents & youth aged 15-24 years; 57 female adolescents & youth aged 15-24 years | Telephone               | VAC; VAW        | Self        | Modified IPV Conflict Tactics Scale (last month)                                        |
| 37 | Lampe et al. (2021)       | Germany       | Quant   | 67 male & female adult survivors average age 49 years                                           | Telephone               | VAW             | Self        | Modified Hurt-Insult-Threaten-Scream (HITS) scale (last 2 weeks)                        |
| 38 | Lawson et al. (2020)      | United States | Quant   | 342 parents of children aged 4-10 years                                                         | Web-based               | VAC             | Proxy       | The Conflict Tactics Scale Parent-Child version (last 2 weeks)                          |
| 39 | Lee et al. (2021)         | United States | Quant   | 291 male & female adults aged $\geq$ 18 years                                                   | Web-based               | VAW             | Self        | Verbal & physical fights, scale NR (last 2 weeks during COVID-19)                       |
| 40 | Machlin et al. (2021)     | United States | Quant   | 120 primary caregivers of children aged 4-11 years                                              | Web-based               | VAC; VAW        | Proxy       | Conflict Tactics Scale (last 8 weeks during COVID-19)                                   |
| 41 | Maftei & Danila (2021)    | Romania       | Quant   | 1,113 men & women aged 18-65 years                                                              | Web-based               | VAW             | Proxy; Self | Cyber Aggression in Relationships Scale (CARS) (last 6 months)                          |
| 42 | Mahapatro et al. (2021)   | India         | Quant   | 36 female survivors                                                                             | Telephone               | VAW             | Self        | Domestic violence, scale NR (during COVID-19)                                           |
| 43 | Mahmood et al. (2021)     | Iraq          | Quant   | 346 women aged 19-66 years                                                                      | Web-based               | VAW             | Self        | Modified WHO multi-country survey IPV tool (before & during lockdown)                   |
| 44 | Moawad et al. (2021)      | Egypt         | Quant   | 509 women aged $\geq$ 18 years                                                                  | Web-based               | VAW             | Self        | Modified WHO multi-country survey VAW tool (during COVID-19)                            |
| 45 | Moya et al. (2021)        | Colombia      | Quant   | 1,376 primary caregivers of children aged 2-5 years                                             | Face-to-face; Telephone | VAW             | Self        | Victim of violence, scale NR (recall NR)                                                |

| No | Study                       | Location       | Methods | Sample                                      | Mode of data collection | Type of measure | Report | Violence measure(s) / themes explored (recall period)                                                                             |
|----|-----------------------------|----------------|---------|---------------------------------------------|-------------------------|-----------------|--------|-----------------------------------------------------------------------------------------------------------------------------------|
| 46 | Muldoon et al. (2021)       | Canada         | Quant   | 216 women $\geq$ 16 years                   | Web-based               | VAW             | Self   | Modified WHO multi-country survey IPV tool (before & during pregnancy & postpartum)                                               |
| 47 | Naghizadeh et al. (2021)    | Iran           | Quant   | 250 women average age 31 years              | Face-to-face            | VAW             | Self   | Modified WHO multi-country survey IPV tool (during COVID-19)                                                                      |
| 48 | Oguntayo et al. (2020)      | Nigeria        | Quant   | 356 men & women aged $\geq$ 18 years        | Web-based               | VAW             | Self   | Composite Abuse Scale for IPV, short form (lifetime, recent & current)                                                            |
| 49 | Ojeahere et al. (2021)      | Nigeria        | Quant   | 474 men & women aged 18-65 years            | Web-based               | VAW             | Self   | IPV, scale NR (prior to & during lockdown)                                                                                        |
| 50 | Parrott et al. (2021)       | United States  | Quant   | 510 men & women $\geq$ 18 years             | Web-based               | VAW             | Proxy  | Psychological Aggression & Physical Aggression subscales of the Revised Conflict Tactics Scale (6 months before & since lockdown) |
| 51 | Pattojoshi et al. (2020)    | India          | Quant   | 560 women average age 37 years              | Web-based               | VAW             | Self   | Spousal violence, scale NR (before or since COVID-19 lockdown)                                                                    |
| 52 | Phillimore et al. (2021)    | Cross-country  | Qual    | 52 male & female survivors aged 20-60 years | Telephone; Web-based    | VAW             | Self   | Structural & gender-based violence (before & during COVID-19)                                                                     |
| 53 | Pinchoff et al. (2021)      | Kenya          | Quant   | 2,009 men & women $\geq$ 18 years           | Telephone               | VAW             | Self   | Household violence, scale NR (due to COVID-19)                                                                                    |
| 54 | Plasilova et al. (2021)     | Czech Republic | Quant   | 429 women $\geq$ 18 years                   | Web-based               | VAW             | Self   | Modified WHO multi-country survey IPV tool (last 3 months)                                                                        |
| 55 | Poonam et al. (2020)        | India          | Quant   | 300 men & women                             | Web-based               | VAW             | Self   | Domestic violence, scale NR (during lockdown)                                                                                     |
| 56 | Raj et al. (2020)           | United States  | Quant   | 2,081 men & women $\geq$ 18 years           | Web-based               | VAW             | Self   | IPV & forced sex, scale NR (lifetime)                                                                                             |
| 57 | Rayhan & Akter (2021)       | Bangladesh     | Quant   | 605 women aged 16-49                        | Face-to-face            | VAW             | Self   | WHO multi-country survey IPV tool (since COVID-19)                                                                                |
| 58 | Sabri et al. (2020)         | United States  | Qual    | 45 female survivors                         | Telephone               | VAW             | Self   | IPV, stalking & controlling behaviors (during COVID-19)                                                                           |
| 59 | Sari et al. (2021)          | Netherlands    | Quant   | 206 parents of toddlers                     | Web-based               | VAC             | Proxy  | Modified Parent-Child Conflict Tactics Scale (last 2 weeks)                                                                       |
| 60 | Schokkenbroek et al. (2021) | Belgium        | Quant   | 1,491 men & women $\geq$ 18 years           | Web-based               | VAW             | Self   | Aggression subscale of the Conflict and Problem Solving Scales, short version (during lockdown)                                   |
| 61 | Sediri et al. (2020)        | Tunisia        | Quant   | 751 women aged 18-69 years                  | Web-based               | VAW             | Self   | Domestic violence, scale NR (before & during lockdown)                                                                            |
| 62 | Sharma & Khokhar (2021)     | India          | Quant   | 94 men and women $\geq$ 20 years            | Web-based               | VAW             | Self   | Domestic violence, scale NR (last year & changes during lockdown)                                                                 |

| No | Study                        | Location      | Methods | Sample                                                                                                                                  | Mode of data collection | Type of measure | Report      | Violence measure(s) / themes explored (recall period)                                                                           |
|----|------------------------------|---------------|---------|-----------------------------------------------------------------------------------------------------------------------------------------|-------------------------|-----------------|-------------|---------------------------------------------------------------------------------------------------------------------------------|
| 63 | Shokair & Hamza (2020)       | Egypt         | Quant   | 160 child survivors in 5 <sup>th</sup> or 6 <sup>th</sup> grade                                                                         | Face-to-face            | VAC             | Self        | Family Violence Diagnosing Scale (lifetime)                                                                                     |
| 64 | Siegel & Lahav (2021)        | Israel        | Quant   | 710 men & women aged 18-81 years                                                                                                        | Web-based               | VAC             | Self        | Childhood Trauma Questionnaire (lifetime)                                                                                       |
| 65 | Soron et al. (2021)          | Bangladesh    | Quant   | 136 men & women aged 17-50 years                                                                                                        | Web-based               | VAW             | Self        | Domestic violence, scale NR (lifetime & during lockdown)                                                                        |
| 66 | Spencer et al. (2021)        | United States | Quant   | 365 men & women aged 17-78 years                                                                                                        | Web-based               | VAW             | Proxy       | Adapted Universal Violence Prevention Screening Protocol (last year)                                                            |
| 67 | Steinhoff et al. (2021)      | Switzerland   | Quant   | 786 youth average age of 22 years                                                                                                       | Web-based               | VAW*            | Proxy       | Adaptation of the Conflict Tactics Scale (last 2 weeks)                                                                         |
| 68 | Tadesse et al. (2020)        | Ethiopia      | Quant   | 617 women aged ≥ 16 years                                                                                                               | Face-to-face            | VAW             | Self        | WHO multi-country survey IPV tool (last 3 months)                                                                               |
| 69 | Tesfaw et al. (2021)         | Ethiopia      | Quant   | 1,288 men & women aged ≥ 18 years                                                                                                       | Face-to-face            | VAW             | Self        | Sexual violence, scale NR (during the pandemic)                                                                                 |
| 70 | Teshome et al. (2021)        | Ethiopia      | Quant   | 464 women                                                                                                                               | Face-to-face            | VAW             | Self        | WHO multi-country survey IPV tool (lifetime & change during the pandemic)                                                       |
| 71 | Tierolf et al. (2021)        | Netherlands   | Mixed   | 87 families, including caregivers of children aged 8-18 years or children aged 8-18 years; 30 caregivers & 9 children (same age ranges) | Telephone; Web-based    | VAW             | Proxy; Self | Revised Conflict Tactics Scale Parent Child & Revised Conflict Tactics Scale-2 (last year); Child abuse & IPV (during COVID-19) |
| 72 | Vijayathi Indu et al. (2021) | India         | Quant   | 209 women aged 18-55 years                                                                                                              | Face-to-face            | VAW             | Self        | Domestic Violence Questionnaire (last 12 months)                                                                                |
| 73 | Yamaoka et al. (2021)        | Japan         | Quant   | 5,344 parents of children aged 0-17 years                                                                                               | Web-based               | VAC; VAW        | Proxy       | Child maltreatment & domestic violence, scales NR (during the pandemic)                                                         |
| 74 | Yari et al. (2021)           | Iran          | Quant   | 203 women aged 19-65 years                                                                                                              | Web-based               | VAW             | Self        | WHO multi-country survey IPV tool (during quarantine)                                                                           |
| 75 | Zhang et al. 2021            | China         | Quant   | 1,062 children aged 12-16 years                                                                                                         | Web-based               | VAC             | Self        | Violence Against Children Survey measures (lifetime before & during lockdown)                                                   |

Notes: Quant = quantitative; Qual = qualitative; Mixed = mixed methodologies (both quantitative and qualitative); NR = not reported; \* = may include components related to VAC, however it is unclear due to the phrasing of violence measures; For mode of data collection, if not explicitly mentioned in the publication, it is assumed that data was collected face-to-face; For type of violence, in cases where participants spanned VAC and VAW categories, for simplicity a study was assigned to the majority category (i.e., VAC if the majority of the same was under age 18 and otherwise, VAW); For type of report, all measures other than self-experienced measures are categorized as proxy reports, including measures of perpetration, as violence is experienced by someone else in the household or community.

**Table A2. Descriptive statistics for ethical items by journal discipline of publication**

|                                                                | All studies<br>N=75 |      | Public health<br>N=40 |      | Medical<br>N=17 |      | Social science<br>N=18 |      |
|----------------------------------------------------------------|---------------------|------|-----------------------|------|-----------------|------|------------------------|------|
|                                                                | n                   | %    | n                     | %    | n               | %    | n                      | %    |
| <i>Domain 1: Institutional Review Board</i>                    |                     |      |                       |      |                 |      |                        |      |
| 1. Ethics clearance                                            | 75                  | 0.87 | 40                    | 0.95 | 17              | 0.94 | 18                     | 0.61 |
| <i>Domain 2: Interviewer selection, training &amp; support</i> |                     |      |                       |      |                 |      |                        |      |
| 2. Interviewer selection                                       | 30                  | 0.33 | 17                    | 0.35 | 5               | 0.40 | 8                      | 0.25 |
| 3. Interviewer training                                        | 30                  | 0.13 | 17                    | 0.12 | 5               | 0.20 | 8                      | 0.13 |
| 4. Interviewer safety & support                                | 30                  | 0.03 | 17                    | 0.06 | 5               | 0.00 | 8                      | 0.00 |
| <i>Domain 3: Sampling &amp; engaging with respondents</i>      |                     |      |                       |      |                 |      |                        |      |
| 5. Sampling design                                             | 75                  | 0.05 | 40                    | 0.03 | 17              | 0.00 | 18                     | 0.17 |
| 6. Informed consent                                            | 75                  | 0.84 | 40                    | 0.88 | 17              | 0.94 | 18                     | 0.67 |
| 7. Informed assent (minors)                                    | 6                   | 0.83 | 4                     | 1.00 | ..              | ..   | 2                      | 0.50 |
| 8. Participant incentives                                      | 75                  | 0.31 | 40                    | 0.33 | 17              | 0.35 | 18                     | 0.22 |
| 9. Interview privacy & safety                                  | 75                  | 0.21 | 40                    | 0.23 | 17              | 0.12 | 18                     | 0.28 |
| 10. Participant feedback                                       | 75                  | 0.00 | 40                    | 0.00 | 17              | 0.00 | 18                     | 0.00 |
| <i>Domain 4: Referrals &amp; adverse events</i>                |                     |      |                       |      |                 |      |                        |      |
| 11. Referral information                                       | 75                  | 0.25 | 40                    | 0.30 | 17              | 0.24 | 18                     | 0.17 |
| 12. Adverse event protocol                                     | 75                  | 0.08 | 40                    | 0.13 | 17              | 0.00 | 18                     | 0.06 |
| 13. Facilitated referrals (minors)                             | 6                   | 0.00 | 4                     | 0.00 | ..              | ..   | 2                      | 0.00 |
| 14. Mandatory reporting (minors)                               | 13                  | 0.08 | 10                    | 0.10 | ..              | ..   | 3                      | 0.00 |
| Total (among non-missing items)                                | 75                  | 0.31 | 40                    | 0.33 | 17              | 0.31 | 18                     | 0.26 |

Notes: The first column under each category (n) shows the total number of eligible studies for which the checklist item is applicable (the denominator from which the score is calculated), while the second column under each category (%) reflects the percentage meeting (scoring 'Yes') to each checklist item, among those applicable. Items 7, 13 and 14 only apply to certain studies, those that either target minors for interviews, ask minors violence questions directly or ask about VAC. Items 2, 3 and 4 only apply to studies that use interviewers to collect data, and do not apply to web-based data collection.



**Table A3. Ethics coding for individual items by study**

| <i>Ethics items</i> |                                 | <b>IRB</b> | <b>Interviewer selection &amp; training</b> |          |          | <b>Sampling &amp; engaging with participants</b> |          |          |          |          |          | <b>Referrals &amp; adverse events</b> |           |           |           |
|---------------------|---------------------------------|------------|---------------------------------------------|----------|----------|--------------------------------------------------|----------|----------|----------|----------|----------|---------------------------------------|-----------|-----------|-----------|
| <b>No</b>           | <b>Study</b>                    |            | <b>1</b>                                    | <b>2</b> | <b>3</b> | <b>4</b>                                         | <b>5</b> | <b>6</b> | <b>7</b> | <b>8</b> | <b>9</b> | <b>10</b>                             | <b>11</b> | <b>12</b> | <b>13</b> |
| 1                   | AboKresha et al. (2021)         | Yes        | NA                                          | NA       | NA       | No                                               | Yes      | NA       | No       | No       | No       | No                                    | No        | NA        | No        |
| 2                   | Abrahams et al. (2021)          | Yes        | No                                          | No       | No       | No                                               | Yes      | NA       | Yes      | No       | No       | No                                    | No        | NA        | NA        |
| 3                   | Abuhammad (2020)                | Yes        | NA                                          | NA       | NA       | No                                               | Yes      | NA       | No       | No       | No       | No                                    | No        | NA        | NA        |
| 4                   | Adibelli et al. (2021)          | Yes        | No                                          | No       | No       | No                                               | Yes      | NA       | No       | No       | No       | No                                    | No        | NA        | NA        |
| 5                   | Ajayi et al. (2021)             | No         | No                                          | No       | No       | No                                               | No       | NA       | No       | No       | No       | No                                    | No        | NA        | NA        |
| 6                   | Alharbi et al. (2021)           | Yes        | NA                                          | NA       | NA       | No                                               | Yes      | NA       | No       | No       | No       | No                                    | No        | NA        | NA        |
| 7                   | Aolymat (2021)                  | Yes        | NA                                          | NA       | NA       | No                                               | Yes      | NA       | No       | No       | No       | No                                    | No        | NA        | NA        |
| 8                   | Arenas-Arroyo et al. (2021)     | Yes        | NA                                          | NA       | NA       | No                                               | No       | NA       | Yes      | No       | No       | No                                    | No        | NA        | NA        |
| 9                   | Augusti et al. (2021)           | Yes        | NA                                          | NA       | NA       | No                                               | Yes      | Yes      | No       | No       | No       | No                                    | No        | No        | No        |
| 10                  | Behera et al. (2021)            | Yes        | Yes                                         | No       | No       | No                                               | Yes      | NA       | No       | No       | No       | No                                    | No        | NA        | NA        |
| 11                  | Boxall et al. (2020)            | Yes        | NA                                          | NA       | NA       | Yes                                              | Yes      | NA       | Yes      | Yes      | No       | Yes                                   | No        | NA        | NA        |
| 12                  | Cannon et al. (2021)            | Yes        | NA                                          | NA       | NA       | No                                               | No       | NA       | No       | No       | No       | No                                    | No        | NA        | NA        |
| 13                  | Cano-Lozano et al. (2021)       | Yes        | NA                                          | NA       | NA       | No                                               | Yes      | NA       | No       | No       | No       | No                                    | No        | NA        | NA        |
| 14                  | Chatzifotiou & Andreadou (2021) | Yes        | No                                          | No       | No       | No                                               | Yes      | NA       | No       | No       | No       | No                                    | No        | NA        | NA        |
| 15                  | Chung et al. (2020)             | Yes        | NA                                          | NA       | NA       | No                                               | Yes      | NA       | Yes      | No       | No       | No                                    | No        | NA        | No        |
| 16                  | Das et al. (2021)               | Yes        | No                                          | No       | No       | No                                               | No       | NA       | No       | No       | No       | No                                    | No        | NA        | NA        |
| 17                  | Das et al. (2021b)              | No         | No                                          | No       | No       | No                                               | Yes      | NA       | No       | No       | No       | No                                    | No        | NA        | NA        |
| 18                  | Dekel & Abrahams (2021)         | Yes        | No                                          | No       | Yes      | No                                               | Yes      | NA       | No       | No       | No       | Yes                                   | Yes       | NA        | NA        |
| 19                  | Diaz et al. (2021)              | Yes        | NA                                          | NA       | NA       | No                                               | Yes      | NA       | Yes      | No       | No       | No                                    | Yes       | NA        | NA        |
| 20                  | Ebert & Steinert (2021)         | Yes        | NA                                          | NA       | NA       | No                                               | Yes      | NA       | Yes      | No       | No       | Yes                                   | No        | NA        | No        |
| 21                  | Egger et al. (2021)             | Yes        | Yes                                         | No       | No       | No                                               | Yes      | NA       | No       | Yes      | No       | No                                    | No        | NA        | No        |
| 22                  | El-Nimr et al. (2021)           | Yes        | NA                                          | NA       | NA       | No                                               | Yes      | NA       | No       | No       | No       | No                                    | No        | NA        | NA        |
| 23                  | Every-Palmer et al. (2020)      | Yes        | NA                                          | NA       | NA       | No                                               | Yes      | NA       | Yes      | No       | No       | Yes                                   | No        | NA        | NA        |
| 24                  | Gebrewahd et al. (2021)         | Yes        | Yes                                         | No       | No       | No                                               | Yes      | NA       | No       | Yes      | No       | No                                    | No        | NA        | NA        |
| 25                  | Ghimire et al. (2020)           | Yes        | NA                                          | NA       | NA       | No                                               | Yes      | NA       | Yes      | No       | No       | No                                    | No        | NA        | NA        |
| 26                  | Gibbons et al. (2021)           | No         | NA                                          | NA       | NA       | No                                               | No       | NA       | Yes      | No       | No       | No                                    | No        | NA        | NA        |
| 27                  | Gresham et al. (2021)           | Yes        | NA                                          | NA       | NA       | No                                               | Yes      | NA       | No       | Yes      | No       | Yes                                   | No        | NA        | NA        |
| 28                  | Gulesci et al. (2021)           | Yes        | Yes                                         | Yes      | No       | No                                               | No       | NA       | No       | Yes      | No       | Yes                                   | Yes       | NA        | NA        |
| 29                  | Hamadani et al. (2021)          | Yes        | Yes                                         | No       | No       | No                                               | Yes      | NA       | Yes      | Yes      | No       | Yes                                   | No        | NA        | NA        |
| 30                  | Haq et al. (2020)               | Yes        | NA                                          | NA       | NA       | No                                               | Yes      | NA       | No       | No       | No       | No                                    | No        | NA        | NA        |



| <i>Ethics items</i> |                             | <b>IRB</b> | <b>Interviewer selection &amp; training</b> |          |          | <b>Sampling &amp; engaging with participants</b> |          |          |          |          |          | <b>Referrals &amp; adverse events</b> |           |           |           |
|---------------------|-----------------------------|------------|---------------------------------------------|----------|----------|--------------------------------------------------|----------|----------|----------|----------|----------|---------------------------------------|-----------|-----------|-----------|
| <b>No</b>           | <b>Study</b>                |            | <b>1</b>                                    | <b>2</b> | <b>3</b> | <b>4</b>                                         | <b>5</b> | <b>6</b> | <b>7</b> | <b>8</b> | <b>9</b> | <b>10</b>                             | <b>11</b> | <b>12</b> | <b>13</b> |
| 31                  | Hastuti et al. (2021)       | Yes        | No                                          | No       | No       | No                                               | Yes      | NA       | No       | No       | No       | No                                    | No        | NA        | NA        |
| 32                  | Huq et al. (2021)           | Yes        | Yes                                         | Yes      | No       | No                                               | Yes      | NA       | No       | Yes      | No       | No                                    | No        | NA        | NA        |
| 33                  | Ibitoye & Ajagunna (2021)   | No         | No                                          | No       | No       | No                                               | Yes      | NA       | No       | No       | No       | No                                    | No        | NA        | NA        |
| 34                  | Jetelina et al. (2020)      | Yes        | NA                                          | NA       | NA       | No                                               | Yes      | NA       | No       | No       | No       | No                                    | No        | NA        | NA        |
| 35                  | Jung et al. (2020)          | Yes        | NA                                          | NA       | NA       | No                                               | Yes      | NA       | No       | No       | No       | No                                    | No        | NA        | NA        |
| 36                  | Karp et al. (2021)          | Yes        | No                                          | No       | No       | No                                               | Yes      | Yes      | Yes      | Yes      | No       | Yes                                   | No        | No        | No        |
| 37                  | Lampe et al. (2021)         | Yes        | No                                          | No       | No       | No                                               | Yes      | NA       | No       | Yes      | No       | Yes                                   | No        | NA        | NA        |
| 38                  | Lawson et al. (2020)        | Yes        | NA                                          | NA       | NA       | No                                               | Yes      | NA       | Yes      | No       | No       | No                                    | No        | NA        | No        |
| 39                  | Lee et al. (2021)           | No         | NA                                          | NA       | NA       | No                                               | Yes      | NA       | Yes      | No       | No       | No                                    | No        | NA        | NA        |
| 40                  | Machlin et al. (2021)       | Yes        | NA                                          | NA       | NA       | No                                               | Yes      | Yes      | No       | No       | No       | No                                    | No        | No        | Yes       |
| 41                  | Maftei & Danila (2021)      | Yes        | NA                                          | NA       | NA       | No                                               | Yes      | NA       | Yes      | No       | No       | Yes                                   | No        | NA        | NA        |
| 42                  | Mahapatro et al. (2021)     | Yes        | Yes                                         | No       | No       | No                                               | Yes      | NA       | No       | Yes      | No       | Yes                                   | Yes       | NA        | NA        |
| 43                  | Mahmood et al. (2021)       | Yes        | NA                                          | NA       | NA       | No                                               | Yes      | NA       | No       | Yes      | No       | Yes                                   | No        | NA        | NA        |
| 44                  | Moawad et al. (2021)        | Yes        | NA                                          | NA       | NA       | No                                               | Yes      | NA       | No       | No       | No       | No                                    | No        | NA        | NA        |
| 45                  | Moya et al. (2021)          | Yes        | No                                          | No       | No       | No                                               | No       | NA       | No       | No       | No       | No                                    | No        | NA        | NA        |
| 46                  | Muldoon et al. (2021)       | Yes        | NA                                          | NA       | NA       | No                                               | Yes      | NA       | No       | Yes      | No       | Yes                                   | No        | NA        | NA        |
| 47                  | Naghizadeh et al. (2021)    | Yes        | No                                          | No       | No       | No                                               | Yes      | NA       | No       | No       | No       | No                                    | No        | NA        | NA        |
| 48                  | Oguntayo et al. (2020)      | No         | NA                                          | NA       | NA       | No                                               | Yes      | NA       | No       | No       | No       | No                                    | No        | NA        | NA        |
| 49                  | Ojeahere et al. (2021)      | Yes        | NA                                          | NA       | NA       | No                                               | Yes      | NA       | No       | No       | No       | Yes                                   | No        | NA        | NA        |
| 50                  | Parrott et al. (2021)       | Yes        | NA                                          | NA       | NA       | No                                               | Yes      | NA       | Yes      | No       | No       | No                                    | No        | NA        | NA        |
| 51                  | Pattojoshi et al. (2020)    | Yes        | NA                                          | NA       | NA       | No                                               | Yes      | NA       | Yes      | No       | No       | No                                    | No        | NA        | NA        |
| 52                  | Phillimore et al. (2021)    | Yes        | No                                          | No       | No       | Yes                                              | Yes      | NA       | No       | Yes      | No       | No                                    | No        | NA        | NA        |
| 53                  | Pinchoff et al. (2021)      | Yes        | No                                          | No       | No       | No                                               | Yes      | NA       | No       | No       | No       | No                                    | No        | NA        | NA        |
| 54                  | Plasilova et al. (2021)     | Yes        | NA                                          | NA       | NA       | No                                               | Yes      | NA       | Yes      | Yes      | No       | No                                    | No        | NA        | NA        |
| 55                  | Poonam et al. (2020)        | No         | NA                                          | NA       | NA       | No                                               | Yes      | NA       | No       | No       | No       | No                                    | No        | NA        | NA        |
| 56                  | Raj et al. (2020)           | Yes        | NA                                          | NA       | NA       | No                                               | Yes      | NA       | Yes      | No       | No       | Yes                                   | No        | NA        | NA        |
| 57                  | Rayhan & Akter (2021)       | Yes        | Yes                                         | No       | No       | No                                               | Yes      | NA       | No       | Yes      | No       | No                                    | No        | NA        | NA        |
| 58                  | Sabri et al. (2020)         | Yes        | No                                          | No       | No       | Yes                                              | Yes      | NA       | Yes      | No       | No       | No                                    | No        | NA        | NA        |
| 59                  | Sari et al. (2021)          | Yes        | NA                                          | NA       | NA       | No                                               | Yes      | NA       | No       | No       | No       | No                                    | No        | NA        | No        |
| 60                  | Schokkenbroek et al. (2021) | Yes        | NA                                          | NA       | NA       | No                                               | No       | NA       | No       | No       | No       | No                                    | No        | NA        | NA        |

| <i>Ethics items</i> |                              | <b>IRB</b> | <b>Interviewer selection &amp; training</b> |          |          | <b>Sampling &amp; engaging with participants</b> |          |          |          |          |          | <b>Referrals &amp; adverse events</b> |           |           |           |
|---------------------|------------------------------|------------|---------------------------------------------|----------|----------|--------------------------------------------------|----------|----------|----------|----------|----------|---------------------------------------|-----------|-----------|-----------|
| <b>No</b>           | <b>Study</b>                 |            | <b>1</b>                                    | <b>2</b> | <b>3</b> | <b>4</b>                                         | <b>5</b> | <b>6</b> | <b>7</b> | <b>8</b> | <b>9</b> | <b>10</b>                             | <b>11</b> | <b>12</b> | <b>13</b> |
| 61                  | Sediri et al. (2020)         | Yes        | NA                                          | NA       | NA       | No                                               | Yes      | NA       | No       | No       | No       | Yes                                   | No        | NA        | NA        |
| 62                  | Sharma & Khokhar (2021)      | No         | NA                                          | NA       | NA       | No                                               | No       | NA       | No       | No       | No       | No                                    | No        | NA        | NA        |
| 63                  | Shokair & Hamza (2020)       | No         | No                                          | No       | No       | No                                               | No       | No       | No       | No       | No       | No                                    | No        | No        | No        |
| 64                  | Siegel & Lahav (2021)        | Yes        | NA                                          | NA       | NA       | No                                               | Yes      | NA       | Yes      | No       | No       | No                                    | No        | NA        | NA        |
| 65                  | Soron et al. (2021)          | Yes        | NA                                          | NA       | NA       | No                                               | Yes      | NA       | No       | No       | No       | No                                    | No        | NA        | NA        |
| 66                  | Spencer et al. (2021)        | No         | NA                                          | NA       | NA       | No                                               | No       | NA       | Yes      | No       | No       | No                                    | No        | NA        | NA        |
| 67                  | Steinhoff et al. (2021)      | Yes        | NA                                          | NA       | NA       | No                                               | Yes      | NA       | Yes      | No       | No       | No                                    | No        | NA        | NA        |
| 68                  | Tadesse et al. (2020)        | Yes        | Yes                                         | Yes      | No       | No                                               | Yes      | NA       | No       | Yes      | No       | Yes                                   | Yes       | NA        | NA        |
| 69                  | Tesfaw et al. (2021)         | Yes        | No                                          | No       | No       | No                                               | Yes      | NA       | No       | No       | No       | No                                    | No        | NA        | NA        |
| 70                  | Teshome et al. (2021)        | Yes        | No                                          | No       | No       | No                                               | Yes      | NA       | No       | No       | No       | Yes                                   | Yes       | NA        | NA        |
| 71                  | Tierolf et al. (2021)        | Yes        | No                                          | No       | No       | No                                               | Yes      | Yes      | Yes      | No       | No       | No                                    | No        | No        | No        |
| 72                  | Vijayathi Indu et al. (2021) | Yes        | Yes                                         | Yes      | No       | No                                               | Yes      | NA       | No       | No       | No       | Yes                                   | No        | NA        | NA        |
| 73                  | Yamaoka et al. (2021)        | Yes        | NA                                          | NA       | NA       | No                                               | No       | NA       | No       | No       | No       | No                                    | No        | NA        | No        |
| 74                  | Yari et al. (2021)           | Yes        | NA                                          | NA       | NA       | No                                               | Yes      | NA       | No       | No       | No       | No                                    | No        | NA        | NA        |
| 75                  | Zhang et al. 2021            | Yes        | NA                                          | NA       | NA       | Yes                                              | Yes      | Yes      | No       | No       | No       | No                                    | No        | No        | No        |

Notes: NA = not applicable

**Table A4: Good practice box on ethical reporting from high scoring studies**

| Domains                                                                        | Illustrative text from high scoring studies                                                                                                                                                                                                                                                                                                                                                                                                                                                                                                                                                                                                                                                                                                                                                                                                                                                                                                                                                                                                                                                                                                                                                                                                                                                                                                                                                                                                                                                                                                                                                                                                                                                                                                                                                                                                                                                                                                                                                                                                                                                                                                                                                                                                    |
|--------------------------------------------------------------------------------|------------------------------------------------------------------------------------------------------------------------------------------------------------------------------------------------------------------------------------------------------------------------------------------------------------------------------------------------------------------------------------------------------------------------------------------------------------------------------------------------------------------------------------------------------------------------------------------------------------------------------------------------------------------------------------------------------------------------------------------------------------------------------------------------------------------------------------------------------------------------------------------------------------------------------------------------------------------------------------------------------------------------------------------------------------------------------------------------------------------------------------------------------------------------------------------------------------------------------------------------------------------------------------------------------------------------------------------------------------------------------------------------------------------------------------------------------------------------------------------------------------------------------------------------------------------------------------------------------------------------------------------------------------------------------------------------------------------------------------------------------------------------------------------------------------------------------------------------------------------------------------------------------------------------------------------------------------------------------------------------------------------------------------------------------------------------------------------------------------------------------------------------------------------------------------------------------------------------------------------------|
| <p><b>Institutional Review Board (IRB)</b></p> <p>[Item 1]</p>                 | <p>All work was approved by the institutional ethical review boards at the International Center for Diarrhoeal Diseases Research, Bangladesh, and Melbourne Health (2016.269) (Hamadani et al. 2021). <b>[Item 1]</b></p> <p>Ethical approval was obtained from Dream Science and Technology Institutional Health Research Ethics Review Committee with approval letter of DSTC/ DHS/002/2020. Then, permission letter was written for Dessie city administration office (Tadesse et al. 2020). <b>[Item 1]</b></p>                                                                                                                                                                                                                                                                                                                                                                                                                                                                                                                                                                                                                                                                                                                                                                                                                                                                                                                                                                                                                                                                                                                                                                                                                                                                                                                                                                                                                                                                                                                                                                                                                                                                                                                            |
| <p><b>Interviewer selection, training &amp; support</b></p> <p>[Items 2-4]</p> | <p>To guarantee respondent's safety, enumerators were trained in each case by an expert on Child Safeguarding Policy following stringent ethical guidelines on how to ask these questions. Enumerators were instructed to take measures to verify the privacy of the interviews. Same-sex enumerators were used when possible (Gulesci et al. 2021). <b>[Items 2, 3, 9]</b></p> <p>Two days training were provided for data collectors and supervisors regarding the sensitivity and personal nature of the questions, objective, and how to approach study participants with ensuring their privacy (Tadesse et al. 2020). <b>[Items 3, 9]</b></p> <p>We recognized that support for participants was vital and thus, prior to each interview we asked each social worker whether he/she would be willing to meet with the women after the interview, if she felt this was needed. This would have been followed up by the first author to ensure that all participants requesting this service, received it, however, no participants requested additional therapy. Psychological support was also arranged for the first author, who conducted the interviews (Dekel &amp; Abrahams 2021) <b>[Item 4, 12]</b></p>                                                                                                                                                                                                                                                                                                                                                                                                                                                                                                                                                                                                                                                                                                                                                                                                                                                                                                                                                                                                                           |
| <p><b>Sampling &amp; engaging with respondents</b></p> <p>[Items 5-10]</p>     | <p>The safety of women participating in the survey was of paramount concern. Given the sensitive nature of the information being collected, a range of safety measures were employed. Safety measures used as part of the survey included:</p> <ul style="list-style-type: none"> <li>• Potential respondents were approached by a social research company with an established online panel rather than by the AIC because it would be less likely to raise the suspicion of an abusive partner;</li> <li>• The survey was designed with multiple landing pages and eligibility questions (including a 'safety trap') to screen out ineligible participants (eg men) from accessing the survey;</li> <li>• The content of the survey, and its explicit focus on women, was revealed to respondents only after they had gone through multiple landing pages, stated they met the eligibility criteria and confirmed that they were in a safe place where they were not being observed;</li> <li>• Women were advised in the information page that, if they felt that answering questions about their relationship experiences would cause them distress or make them unsafe, they should not complete the survey;</li> <li>• Women who closed the survey at any point were not approached again;</li> <li>• The survey was kept as short as possible and piloted to ensure that women would spend no more than 10 minutes completing all the questions; and</li> <li>• Participants were provided with information about a range of support services, including services that could be contacted online or over the phone. Finally, all of the survey questions were closed-response, meaning that respondents did not have to write any responses. This limited the potential for abusive partners to use keyloggers to access information their partners provided in the survey (Boxall et al. 2020) <b>[Items 5, 9, 11]</b></li> </ul> <p>The women were approached by the female counselors of MSSK over the phone. They had to be telephoned several times before they could be reached. A few limitations that were encountered in virtual communication included fear of a lack of privacy and confidentiality. In many cases, women</p> |

|                                                                |                                                                                                                                                                                                                                                                                                                                                                                                                                                                                                                                                                                                                                                                                                                                                                                                                                                                                                                                                                                                                                                                                                                                                                                                                                                                                                                                                                                                                                                                                                                                                                                                                                                                                                                                                                                                                                                                                                                                                                                                            |
|----------------------------------------------------------------|------------------------------------------------------------------------------------------------------------------------------------------------------------------------------------------------------------------------------------------------------------------------------------------------------------------------------------------------------------------------------------------------------------------------------------------------------------------------------------------------------------------------------------------------------------------------------------------------------------------------------------------------------------------------------------------------------------------------------------------------------------------------------------------------------------------------------------------------------------------------------------------------------------------------------------------------------------------------------------------------------------------------------------------------------------------------------------------------------------------------------------------------------------------------------------------------------------------------------------------------------------------------------------------------------------------------------------------------------------------------------------------------------------------------------------------------------------------------------------------------------------------------------------------------------------------------------------------------------------------------------------------------------------------------------------------------------------------------------------------------------------------------------------------------------------------------------------------------------------------------------------------------------------------------------------------------------------------------------------------------------------|
|                                                                | <p>were reluctant to answer questions about violence that they deemed unimportant in comparison to their immediate concerns regarding food, money, health, and the prevailing situation. Some women refused to answer questions over the phone and wanted to talk through a physical confrontation in MSSK only. However, measures were taken to minimize the risk of this non-response bias by allowing respondents to choose a suitable date and time. Thereafter, the counselor tried several times to contact the women when they could respond without the fear of their conversation being interrupted or eavesdropped. This was essential to guarantee their safety, apart from pre-serving the ethics and protocols of research so that respondents were comfortable enough to respond freely (Mahapatro et al. 2021). [Items 5, 9]</p> <p>We had obtained verbal consent from individual study participants before beginning of data collection (Tadesse et al. 2020) [Item 6]</p> <p>Verbal informed consent was obtained from participants aged 18 and older; those younger than 18 provided verbal assent with a parent/guardian providing consent (Karp et al. 2021) [Item 7]</p> <p>Participants were not compensated for their time in this study, although they had been compensated during the main trial at each visit (baseline, midline, endline). Women were warned before commencement of the intimate partner violence module and encouraged to seek privacy; they could decline to answer any module (Hamadani et al. 2021). [Items 8, 9]</p> <p>In the case of phone interviews, additional steps were taken to prevent potential perpetrators from listening to participants' answers. In particular, the interviewer provided examples of what types of actions are considered as violent; participants were asked to answer only "yes" or "no" and given the option of not answering the question if they did not feel comfortable with it. (Gulesci et al. 2021) [Item 9]</p> |
| <p><b>Referrals &amp; adverse events</b><br/>[Items 11-14]</p> | <p>Authors provided text from the questionnaire in a technical appendix: "If you feel upset about anything (now or while completing the survey), the details of someone you can talk to will be made available to you. We have also provided the contact details for services that can support women who are experiencing violence. If you need any kind of help or support, it is available" (Boxall et al. 2020). [Item 11]</p> <p>Respondents were also provided with a list of all the institutions where a violence victim can receive help and protection as well as the procedure to file a complaint (Appendix A.2 shows pictures of the material given to participants). Enumerators received an adverse event protocol explaining what they had to do in cases of abuse (Gulesci et al. 2021). [Items 11, 12]</p> <p>The women who were victims of IPV at the time of data collection were reassured and counseled. However, women who experienced severe IPV and were in need of help were taken to Dessie referral hospital counseling care units (Tadesse et al. 2020). [Item 12]</p> <p>As per the government guidelines, follow-up measures were taken by the counselors and they were expected to call each survivor and understand their situation, extend support, and ensure their safety (Mahapatro et al. 2021). [Item 12]</p> <p>If parents or children reported prior experiences of family violence at baseline, the study reported violence exposure to child protective services if not previously reported (Machlin et al. 2021) [Item 14]</p>                                                                                                                                                                                                                                                                                                                                                                                                                                  |

Notes: Table is based primarily on the five studies which reported on more than half the items in the ethics reporting checklist (Boxall et al. 2020, 75%; Tadesse et al. 2020, 64%; Gulesci et al. 2021, 55%; Hamadani et al. 2021, 55%; Mahapatro et al. 2021, 55%). In addition, examples are augmented by additional studies providing examples of rarely reported items (Dekel & Abrahams 2021; Karp et al. 2021; Machlin et al. 2021). All text included is a direct quotation.

**Table A5: Preferred Reporting Items for Systematic Reviews and Meta-Analyses (PRISMA) 2020 checklist**

| Section and Topic             | Item # | Checklist item                                                                                                                                                                                                                                                                                       | Location where item is reported [pre-layout page references] |
|-------------------------------|--------|------------------------------------------------------------------------------------------------------------------------------------------------------------------------------------------------------------------------------------------------------------------------------------------------------|--------------------------------------------------------------|
| <b>TITLE</b>                  |        |                                                                                                                                                                                                                                                                                                      |                                                              |
| Title                         | 1      | Identify the report as a systematic review.                                                                                                                                                                                                                                                          | Title – we have specified it is a review                     |
| <b>ABSTRACT</b>               |        |                                                                                                                                                                                                                                                                                                      |                                                              |
| Abstract                      | 2      | See the PRISMA 2020 for Abstracts checklist.                                                                                                                                                                                                                                                         | P1                                                           |
| <b>INTRODUCTION</b>           |        |                                                                                                                                                                                                                                                                                                      |                                                              |
| Rationale                     | 3      | Describe the rationale for the review in the context of existing knowledge.                                                                                                                                                                                                                          | P4                                                           |
| Objectives                    | 4      | Provide an explicit statement of the objective(s) or question(s) the review addresses.                                                                                                                                                                                                               | P4                                                           |
| <b>METHODS</b>                |        |                                                                                                                                                                                                                                                                                                      |                                                              |
| Eligibility criteria          | 5      | Specify the inclusion and exclusion criteria for the review and how studies were grouped for the syntheses.                                                                                                                                                                                          | P5                                                           |
| Information sources           | 6      | Specify all databases, registers, websites, organisations, reference lists and other sources searched or consulted to identify studies. Specify the date when each source was last searched or consulted.                                                                                            | P5                                                           |
| Search strategy               | 7      | Present the full search strategies for all databases, registers and websites, including any filters and limits used.                                                                                                                                                                                 | P5                                                           |
| Selection process             | 8      | Specify the methods used to decide whether a study met the inclusion criteria of the review, including how many reviewers screened each record and each report retrieved, whether they worked independently, and if applicable, details of automation tools used in the process.                     | P5                                                           |
| Data collection process       | 9      | Specify the methods used to collect data from reports, including how many reviewers collected data from each report, whether they worked independently, any processes for obtaining or confirming data from study investigators, and if applicable, details of automation tools used in the process. | P6                                                           |
| Data items                    | 10a    | List and define all outcomes for which data were sought. Specify whether all results that were compatible with each outcome domain in each study were sought (e.g. for all measures, time points, analyses), and if not, the methods used to decide which results to collect.                        | P6                                                           |
|                               | 10b    | List and define all other variables for which data were sought (e.g. participant and intervention characteristics, funding sources). Describe any assumptions made about any missing or unclear information.                                                                                         | P6, Table 1                                                  |
| Study risk of bias assessment | 11     | Specify the methods used to assess risk of bias in the included studies, including details of the tool(s) used, how many reviewers assessed each study and whether they worked independently, and if applicable, details of automation tools used in the process.                                    | N/A                                                          |
| Effect measures               | 12     | Specify for each outcome the effect measure(s) (e.g. risk ratio, mean difference) used in the synthesis or presentation of results.                                                                                                                                                                  | N/A                                                          |
| Synthesis methods             | 13a    | Describe the processes used to decide which studies were eligible for each synthesis (e.g. tabulating the study intervention                                                                                                                                                                         | P6 and 7                                                     |

| Section and Topic             | Item # | Checklist item                                                                                                                                                                                                                                                                       | Location where item is reported [pre-layout page references] |
|-------------------------------|--------|--------------------------------------------------------------------------------------------------------------------------------------------------------------------------------------------------------------------------------------------------------------------------------------|--------------------------------------------------------------|
|                               |        | characteristics and comparing against the planned groups for each synthesis (item #5)).                                                                                                                                                                                              |                                                              |
|                               | 13b    | Describe any methods required to prepare the data for presentation or synthesis, such as handling of missing summary statistics, or data conversions.                                                                                                                                | P7                                                           |
|                               | 13c    | Describe any methods used to tabulate or visually display results of individual studies and syntheses.                                                                                                                                                                               | P7                                                           |
|                               | 13d    | Describe any methods used to synthesize results and provide a rationale for the choice(s). If meta-analysis was performed, describe the model(s), method(s) to identify the presence and extent of statistical heterogeneity, and software package(s) used.                          | P7                                                           |
|                               | 13e    | Describe any methods used to explore possible causes of heterogeneity among study results (e.g. subgroup analysis, meta-regression).                                                                                                                                                 | P7                                                           |
|                               | 13f    | Describe any sensitivity analyses conducted to assess robustness of the synthesized results.                                                                                                                                                                                         | N/A                                                          |
| Reporting bias assessment     | 14     | Describe any methods used to assess risk of bias due to missing results in a synthesis (arising from reporting biases).                                                                                                                                                              | N/A                                                          |
| Certainty assessment          | 15     | Describe any methods used to assess certainty (or confidence) in the body of evidence for an outcome.                                                                                                                                                                                | N/A                                                          |
| <b>RESULTS</b>                |        |                                                                                                                                                                                                                                                                                      |                                                              |
| Study selection               | 16a    | Describe the results of the search and selection process, from the number of records identified in the search to the number of studies included in the review, ideally using a flow diagram.                                                                                         | P8 and Supplementary file P1 (Figure A1)                     |
|                               | 16b    | Cite studies that might appear to meet the inclusion criteria, but which were excluded, and explain why they were excluded.                                                                                                                                                          | N/A                                                          |
| Study characteristics         | 17     | Cite each included study and present its characteristics.                                                                                                                                                                                                                            | Supplementary file P2-6 (Table A1)                           |
| Risk of bias in studies       | 18     | Present assessments of risk of bias for each included study.                                                                                                                                                                                                                         | N/A                                                          |
| Results of individual studies | 19     | For all outcomes, present, for each study: (a) summary statistics for each group (where appropriate) and (b) an effect estimate and its precision (e.g. confidence/credible interval), ideally using structured tables or plots.                                                     | P22 (Table 2)                                                |
| Results of syntheses          | 20a    | For each synthesis, briefly summarise the characteristics and risk of bias among contributing studies.                                                                                                                                                                               | N/A                                                          |
|                               | 20b    | Present results of all statistical syntheses conducted. If meta-analysis was done, present for each the summary estimate and its precision (e.g. confidence/credible interval) and measures of statistical heterogeneity. If comparing groups, describe the direction of the effect. | P22 (Table 2) and Supplementary file P7 (Table A2)           |

| Section and Topic                              | Item # | Checklist item                                                                                                                                                                                                                             | Location where item is reported [pre-layout page references] |
|------------------------------------------------|--------|--------------------------------------------------------------------------------------------------------------------------------------------------------------------------------------------------------------------------------------------|--------------------------------------------------------------|
|                                                | 20c    | Present results of all investigations of possible causes of heterogeneity among study results.                                                                                                                                             | P22 (Table 2) and Supplementary file P7 (Table A2)           |
|                                                | 20d    | Present results of all sensitivity analyses conducted to assess the robustness of the synthesized results.                                                                                                                                 | N/A                                                          |
| Reporting biases                               | 21     | Present assessments of risk of bias due to missing results (arising from reporting biases) for each synthesis assessed.                                                                                                                    | N/A                                                          |
| Certainty of evidence                          | 22     | Present assessments of certainty (or confidence) in the body of evidence for each outcome assessed.                                                                                                                                        | N/A                                                          |
| <b>DISCUSSION</b>                              |        |                                                                                                                                                                                                                                            |                                                              |
| Discussion                                     | 23a    | Provide a general interpretation of the results in the context of other evidence.                                                                                                                                                          | P10-11                                                       |
|                                                | 23b    | Discuss any limitations of the evidence included in the review.                                                                                                                                                                            | P13                                                          |
|                                                | 23c    | Discuss any limitations of the review processes used.                                                                                                                                                                                      | P13                                                          |
|                                                | 23d    | Discuss implications of the results for practice, policy, and future research.                                                                                                                                                             | P12,14                                                       |
| <b>OTHER INFORMATION</b>                       |        |                                                                                                                                                                                                                                            |                                                              |
| Registration and protocol                      | 24a    | Provide registration information for the review, including register name and registration number, or state that the review was not registered.                                                                                             | P7                                                           |
|                                                | 24b    | Indicate where the review protocol can be accessed, or state that a protocol was not prepared.                                                                                                                                             | P7                                                           |
|                                                | 24c    | Describe and explain any amendments to information provided at registration or in the protocol.                                                                                                                                            | N/A                                                          |
| Support                                        | 25     | Describe sources of financial or non-financial support for the review, and the role of the funders or sponsors in the review.                                                                                                              | P15                                                          |
| Competing interests                            | 26     | Declare any competing interests of review authors.                                                                                                                                                                                         | P15                                                          |
| Availability of data, code and other materials | 27     | Report which of the following are publicly available and where they can be found: template data collection forms; data extracted from included studies; data used for all analyses; analytic code; any other materials used in the review. | P15                                                          |

From: Page MJ, McKenzie JE, Bossuyt PM, Boutron I, Hoffmann TC, Mulrow CD, et al. The PRISMA 2020 statement: an updated guideline for reporting systematic reviews. *BMJ* 2021;372:n71. doi: 10.1136/bmj.n71

For more information, visit: <http://www.prisma-statement.org/>



**Included primary studies collecting data on violence against women and/or violence against children**

AboKresha SA, Abdelkreem E, Ali RAE. Impact of COVID-19 pandemic and related isolation measures on violence against children in Egypt. *J Egypt Public Health Assoc.* 2021;96(1):11. doi:[10.1186/s42506-021-00071-4](https://doi.org/10.1186/s42506-021-00071-4)

Abrahams Z, Boisits S, Schneider M, Prince M, Lund C. The relationship between common mental disorders (CMDs), food insecurity and domestic violence in pregnant women during the COVID-19 lockdown in Cape Town, South Africa. *Soc Psychiatry Psychiatr Epidemiol.* 2022;57(1):37-46. doi:[10.1007/s00127-021-02140-7](https://doi.org/10.1007/s00127-021-02140-7)

Abuhammad S. Violence against Jordanian Women during COVID-19 Outbreak. *Int J Clin Pract.* 2021;75(3). doi:[10.1111/ijcp.13824](https://doi.org/10.1111/ijcp.13824)

Adibelli D, Sümen A, Teskereci G. Domestic violence against women during the Covid-19 pandemic: Turkey sample. *Health Care for Women International.* 2021;42(3):335-350. doi:[10.1080/07399332.2021.1885408](https://doi.org/10.1080/07399332.2021.1885408)

Ajayi OA, Ibrahim AT, Kayode OE. COVID-19 Pandemic Lockdown, Intimate Partner Violence and Family Cohesion in Kano, Nigeria. *Rev. Universitara Sociologie.* 2021:83. [cited 2022 Mar 1]. Available from: <https://tinyurl.com/yckzxfh6>

Alharbi FF, Alkheraiji MA, Aljumah AA, Al-Eissa M, Qasim SS, Alaqeel MK. Domestic Violence Against Married Women During the COVID-19 Quarantine in Saudi Arabia. *Cureus.* Published online May 25, 2021. doi:[10.7759/cureus.15231](https://doi.org/10.7759/cureus.15231)

Arenas-Arroyo E, Fernandez-Kranz D, Nollenberger N. Intimate partner violence under forced cohabitation and economic stress: Evidence from the COVID-19 pandemic. *Journal of Public Economics.* 2021;194:104350. doi:[10.1016/j.jpubeco.2020.104350](https://doi.org/10.1016/j.jpubeco.2020.104350)

Augusti EM, Sætren SS, Hafstad GS. Violence and abuse experiences and associated risk factors during the COVID-19 outbreak in a population-based sample of Norwegian adolescents. *Child Abuse & Neglect.* 2021;118:105156. doi:[10.1016/j.chiabu.2021.105156](https://doi.org/10.1016/j.chiabu.2021.105156)

Behera RR, Borgohain J, Rath CS, Patnaik P. Well-being of female domestic workers during three months of COVID-19 lockdown: Case study from IIT Kharagpur campus. *Indian Journal of Health and Wellbeing.* 2021 Mar 1;12(1):83-92. [cited 2022 Mar 1]. Available from: <https://tinyurl.com/yc6tbh82>

Boxall H, Morgan A. Who is most at risk of physical and sexual partner violence and coercive control during the COVID-19 pandemic? [Internet]. Australian Institute of Criminology; 2021 [cited 2022 Mar 1]. Available from: <https://www.aic.gov.au/publications/tandi/tandi618>

Boxall H, Morgan A, Brown R. The prevalence of domestic violence among women during the COVID-19 pandemic. *Australasian Policing.* 2020 Sep;12(3):38-46. [cited 2022 Mar 1]. Available from: <https://search.informit.org/doi/epdf/10.3316/informit.435862482298266>

- Cannon CEB, Ferreira R, Buttell F, First J. COVID-19, Intimate Partner Violence, and Communication Ecologies. *American Behavioral Scientist*. 2021;65(7):992-1013. doi:[10.1177/0002764221992826](https://doi.org/10.1177/0002764221992826)
- Cano-Lozano MC, Navas-Martínez MJ, Contreras L. Child-to-Parent Violence during Confinement Due to COVID-19: Relationship with Other Forms of Family Violence and Psychosocial Stressors in Spanish Youth. *Sustainability*. 2021;13(20):11431. doi:[10.3390/su132011431](https://doi.org/10.3390/su132011431)
- Chatzifotiou S, Andreadou D. Domestic Violence During the Time of the COVID-19 Pandemic: Experiences and Coping Behavior of Women from Northern Greece. *International Perspectives in Psychology*. 2021;10(3):180-187. doi:[10.1027/2157-3891/a000021](https://doi.org/10.1027/2157-3891/a000021)
- Chung G, Lanier P, Wong PYJ. Mediating Effects of Parental Stress on Harsh Parenting and Parent-Child Relationship during Coronavirus (COVID-19) Pandemic in Singapore. *J Fam Viol*. 2022;1(37):801–812. doi:[10.1007/s10896-020-00200-1](https://doi.org/10.1007/s10896-020-00200-1)
- Das et al. Locked in: An Evidence based Study on Domestic Violence during COVID-19 in the Hilly Region of India. *Indian Journal of Public Health Research & Development*. 2021;12(3):6–15. doi:[10.37506/ijphrd.v12i3.16030](https://doi.org/10.37506/ijphrd.v12i3.16030)
- Dekel B, Abrahams N. ‘I will rather be killed by corona than by him...’: Experiences of abused women seeking shelter during South Africa’s COVID-19 lockdown. López-Goñi JJ, ed. *PLoS ONE*. 2021;16(10):e0259275. doi:[10.1371/journal.pone.0259275](https://doi.org/10.1371/journal.pone.0259275)
- Diaz A, Nucci-Sack A, Colon R, et al. Impact of COVID-19 Mitigation Measures on Inner-City Female Youth in New York City. *Journal of Adolescent Health*. 2022;70(2):220-227. doi:[10.1016/j.jadohealth.2021.10.015](https://doi.org/10.1016/j.jadohealth.2021.10.015)
- Ebert C, Steinert JI. Prevalence and risk factors of violence against women and children during COVID-19, Germany. *Bull World Health Organ*. 2021;99(6):429-438. doi:[10.2471/BLT.20.270983](https://doi.org/10.2471/BLT.20.270983)
- Egger D, Miguel E, Warren SS, et al. Falling living standards during the COVID-19 crisis: Quantitative evidence from nine developing countries. *Sci Adv*. 2021;7(6):eabe0997. doi:[10.1126/sciadv.abe0997](https://doi.org/10.1126/sciadv.abe0997)
- El-Nimr NA, Mamdouh HM, Ramadan A, El Saeh HM, Shata ZN. Intimate partner violence among Arab women before and during the COVID-19 lockdown. *J Egypt Public Health Assoc*. 2021;96(1):15. doi:[10.1186/s42506-021-00077-y](https://doi.org/10.1186/s42506-021-00077-y)
- Every-Palmer S, Jenkins M, Gendall P, et al. Psychological distress, anxiety, family violence, suicidality, and wellbeing in New Zealand during the COVID-19 lockdown: A cross-sectional study. Francis JM, ed. *PLoS ONE*. 2020;15(11):e0241658. doi:[10.1371/journal.pone.0241658](https://doi.org/10.1371/journal.pone.0241658)

- Gebrewahd GT, Gebremeskel GG, Tadesse DB. Intimate partner violence against reproductive age women during COVID-19 pandemic in northern Ethiopia 2020: a community-based cross-sectional study. *Reprod Health*. 2020;17(1):152. doi:[10.1186/s12978-020-01002-w](https://doi.org/10.1186/s12978-020-01002-w)
- Gibbons MA, Murphy TE, Rossi MA. Confinement and intimate partner violence. *Kyklos*. 2021;74(3):349-361. doi:[10.1111/kykl.12275](https://doi.org/10.1111/kykl.12275)
- Gresham AM, Peters BJ, Karantzas G, Cameron LD, Simpson JA. Examining associations between COVID-19 stressors, intimate partner violence, health, and health behaviors. *Journal of Social and Personal Relationships*. 2021;38(8):2291-2307. doi:[10.1177/02654075211012098](https://doi.org/10.1177/02654075211012098)
- Gulesci S, Puente-Beccar M, Ubfal D. Can youth empowerment programs reduce violence against girls during the COVID-19 pandemic? *Journal of Development Economics*. 2021;153:102716. doi:[10.1016/j.jdeveco.2021.102716](https://doi.org/10.1016/j.jdeveco.2021.102716)
- Hamadani JD, Hasan MI, Baldi AJ, et al. Immediate impact of stay-at-home orders to control COVID-19 transmission on socioeconomic conditions, food insecurity, mental health, and intimate partner violence in Bangladeshi women and their families: an interrupted time series. *The Lancet Global Health*. 2020;8(11):e1380-e1389. doi:[10.1016/S2214-109X\(20\)30366-1](https://doi.org/10.1016/S2214-109X(20)30366-1)
- Haq W, Raza SH, Mahmood T. The pandemic paradox: domestic violence and happiness of women. *Peer J*. 2020;8:e10472. doi:[10.7717/peerj.10472](https://doi.org/10.7717/peerj.10472)
- Hastuti L, Mardiani R, Rahmawati A, Wahyuni T, Kusumajaya S. Analysis of Risk Factors Related to the Events Domestic Violence (Qualitative Study on Women Victims of Violence During the Covid-19 Pandemic). *International Journal of Progressive Sciences and Technologies*. 2021;27(2):11. Available from: <https://tinyurl.com/3n3vj6kh>
- Huq M, Das T, Devakumar D, Daruwalla N, Osrin D. Intersectional tension: a qualitative study of the effects of the COVID-19 response on survivors of violence against women in urban India. *BMJ Open*. 2021;11(9):e050381. doi:[10.1136/bmjopen-2021-050381](https://doi.org/10.1136/bmjopen-2021-050381)
- Ibitoye TR, Ajagunna F. Sexual autonomy and violence against women in Nigeria: Assessing the impact of Covid-19 pandemic. *De Jure*. 2021;54. doi:[10.17159/2225-7160/2021/v54a9](https://doi.org/10.17159/2225-7160/2021/v54a9)
- Indu PV, Vijayan B, Tharayil HM, Ayirolimeethal A, Vidyadharan V. Domestic violence and psychological problems in married women during COVID-19 pandemic and lockdown: A community-based survey. *Asian Journal of Psychiatry*. 2021;64:102812. doi:[10.1016/j.ajp.2021.102812](https://doi.org/10.1016/j.ajp.2021.102812)
- Jetelina KK, Knell G, Molsberry RJ. Changes in intimate partner violence during the early stages of the COVID-19 pandemic in the USA. *Inj Prev*. 2021;27(1):93-97. doi:[10.1136/injuryprev-2020-043831](https://doi.org/10.1136/injuryprev-2020-043831)

- Jung S, Kneer J, Krüger THC. Mental Health, Sense of Coherence, and Interpersonal Violence during the COVID-19 Pandemic Lockdown in Germany. *JCM*. 2020;9(11):3708. doi:[10.3390/jcm9113708](https://doi.org/10.3390/jcm9113708)
- Karp C, Moreau C, Sheehy G, et al. Youth Relationships in the Era of COVID-19: A Mixed-Methods Study Among Adolescent Girls and Young Women in Kenya. *Journal of Adolescent Health*. 2021;69(5):754-761. doi:[10.1016/j.jadohealth.2021.07.017](https://doi.org/10.1016/j.jadohealth.2021.07.017)
- Lampe A, Daniels JK, Trawöger I, Beck T, Riedl D. Did domestic violence really increase in the early phase of the COVID-19 pandemic? Results of an interview-based observational study. *Zeitschrift für Psychosomatische Medizin und Psychotherapie*. 2021;67(3):303-314. doi:[10.13109/zptm.2021.67.oa8](https://doi.org/10.13109/zptm.2021.67.oa8)
- Lawson M, Piel MH, Simon M. Child Maltreatment during the COVID-19 Pandemic: Consequences of Parental Job Loss on Psychological and Physical Abuse Towards Children. *Child Abuse & Neglect*. 2020;110:104709. doi:[10.1016/j.chiabu.2020.104709](https://doi.org/10.1016/j.chiabu.2020.104709)
- Lee SJ, Ward KP, Rodriguez CM. Longitudinal Analysis of Short-term Changes in Relationship Conflict During COVID-19: A Risk and Resilience Perspective. *J Interpers Violence*. 2021 April :23. <https://doi.org/10.1177/08862605211006359>
- Machlin L, Gruhn MA, Miller AB, et al. Predictors of family violence in North Carolina following initial COVID-19 stay-at-home orders. *Child Abuse & Neglect*. Published online October 2021:105376. doi:[10.1016/j.chiabu.2021.105376](https://doi.org/10.1016/j.chiabu.2021.105376)
- Maftai A, Dănilă O. Give me your password! What are you hiding? Associated factors of intimate partner violence through technological abuse. *Curr Psychol*. Published online August 10, 2021. doi:[10.1007/s12144-021-02197-2](https://doi.org/10.1007/s12144-021-02197-2)
- Mahapatro M, Prasad MM, Singh SP. Role of Social Support in Women facing Domestic Violence during Lockdown of Covid-19 while Cohabiting with the Abusers: Analysis of Cases Registered with the Family Counseling Centre, Alwar, India. *Journal of Family Issues*. 2021;42(11):2609-2624. doi:[10.1177/0192513X20984496](https://doi.org/10.1177/0192513X20984496)
- Mahmood KI, Shabu SA, M-Amen KM, et al. The Impact of COVID-19 Related Lockdown on the Prevalence of Spousal Violence Against Women in Kurdistan Region of Iraq. *J Interpers Violence*. 2021 February. doi:[10.1177/0886260521997929](https://doi.org/10.1177/0886260521997929)
- Moawad AM, El Desouky ED, Salem MR, Elhawary AS, Hussein SM, Hassan FM. Violence and sociodemographic related factors among a sample of Egyptian women during the COVID-19 pandemic. *Egypt J Forensic Sci*. 2021;11(1):29. doi:[10.1186/s41935-021-00243-5](https://doi.org/10.1186/s41935-021-00243-5)
- Morgan A, Boxall H. Social Isolation, Time Spent at Home, Financial Stress and Domestic Violence during the COVID-19 Pandemic. *Australian Institute of Criminology*; 2020. doi:[10.52922/ti04855](https://doi.org/10.52922/ti04855)

- Moya A, Serneels P, Desrosiers A, Reyes V, Torres MJ, Lieberman A. The COVID-19 pandemic and maternal mental health in a fragile and conflict-affected setting in Tumaco, Colombia: a cohort study. *The Lancet Global Health*. 2021;9(8):e1068-e1076. doi:[10.1016/S2214-109X\(21\)00217-5](https://doi.org/10.1016/S2214-109X(21)00217-5)
- Muldoon KA, Denize KM, Talarico R, et al. COVID-19 and perinatal intimate partner violence: a cross-sectional survey of pregnant and postpartum individuals in the early stages of the COVID-19 pandemic. *BMJ Open*. 2021;11(5):e049295. doi:[10.1136/bmjopen-2021-049295](https://doi.org/10.1136/bmjopen-2021-049295)
- Naghizadeh S, Mirghafourvand M, Mohammadirad R. Domestic violence and its relationship with quality of life in pregnant women during the outbreak of COVID-19 disease. *BMC Pregnancy Childbirth*. 2021;21(1):88. doi:[10.1186/s12884-021-03579-x](https://doi.org/10.1186/s12884-021-03579-x)
- Oguntayo R, Oyeleke J, John-Oguntayo O, Aajayi-Hutchful F. Personality Traits, Emotional Intelligence, Socio-contextual Factors and Spousal Violence: The Trajectory of COVID-19 Pandemic Lockdown. *IJBS*. 2020;14(2). doi:[10.30491/ijbs.2020.232959.1290](https://doi.org/10.30491/ijbs.2020.232959.1290)
- Ojeahere MI, Kumswa SK, Adiukwu F, Plang JP, Taiwo YF. Intimate Partner Violence and its Mental Health Implications Amid COVID-19 Lockdown: Findings Among Nigerian Couples. *J Interpers Violence*. Published online May 15, 2021:0886260521101521. doi:[10.1177/08862605211015213](https://doi.org/10.1177/08862605211015213)
- Parrott DJ, Halmos MB, Stappenbeck CA, Moino K. Intimate partner aggression during the COVID-19 pandemic: Associations with stress and heavy drinking. *Psychology of Violence*. 2022;12(2):95-103. doi:[10.1037/vio0000395](https://doi.org/10.1037/vio0000395)
- Pattojoshi A, Sidana A, Garg S, et al. Staying home is NOT 'staying safe': A rapid 8-day online survey on spousal violence against women during the COVID -19 lockdown in India. *Psychiatry Clin Neurosci*. 2021;75(2):64-66. doi:[10.1111/pcn.13176](https://doi.org/10.1111/pcn.13176)
- Phillimore J, Pertek S, Akyuz S, et al. "We are Forgotten": Forced Migration, Sexual and Gender-Based Violence, and Coronavirus Disease-2019. *Violence Against Women*. Published online September 17, 2021:107780122110309. doi:[10.1177/10778012211030943](https://doi.org/10.1177/10778012211030943)
- Pinchoff J, Austrian K, Rajshekhar N, et al. Gendered economic, social and health effects of the COVID-19 pandemic and mitigation policies in Kenya: evidence from a prospective cohort survey in Nairobi informal settlements. *BMJ Open*. 2021;11(3):e042749. doi:[10.1136/bmjopen-2020-042749](https://doi.org/10.1136/bmjopen-2020-042749)
- Plášilová L, Hůla M, Krejčová L, Klapilová K. The COVID-19 Pandemic and Intimate Partner Violence against Women in the Czech Republic: Incidence and Associated Factors. *IJERPH*. 2021;18(19):10502. doi:[10.3390/ijerph181910502](https://doi.org/10.3390/ijerph181910502)
- Poonam, Pooja Tyagi. Correlates of domestic violence in relation to physical health and perceived stress during lockdown. *Shodh Sarita*. 2020;7(27):66-71. [cited 2022 Mar 1]. Available from: <https://tinyurl.com/3v3zuaer>

- Raj A, Johns NE, Barker KM, Silverman JG. Time from COVID-19 shutdown, gender-based violence exposure, and mental health outcomes among a state representative sample of California residents. *EClinicalMedicine*. 2020;26:100520. doi:[10.1016/j.eclinm.2020.100520](https://doi.org/10.1016/j.eclinm.2020.100520)
- Rashid Soron T, Ashiq MAR, Al-Hakeem M, Chowdhury ZF, Uddin Ahmed H, Afrooz Chowdhury C. Domestic Violence and Mental Health During the COVID-19 Pandemic in Bangladesh. *JMIR Form Res*. 2021;5(9):e24624. doi:[10.2196/24624](https://doi.org/10.2196/24624)
- Rayhan I, Akter K. Prevalence and associated factors of intimate partner violence (IPV) against women in Bangladesh amid COVID-19 pandemic. *Heliyon*. 2021;7(3):e06619. doi:[10.1016/j.heliyon.2021.e06619](https://doi.org/10.1016/j.heliyon.2021.e06619)
- Sabri B, Hartley M, Saha J, Murray S, Glass N, Campbell JC. Effect of COVID-19 pandemic on women's health and safety: A study of immigrant survivors of intimate partner violence. *Health Care for Women International*. 2020;41(11-12):1294-1312. doi:[10.1080/07399332.2020.1833012](https://doi.org/10.1080/07399332.2020.1833012)
- Sari NP, van IJzendoorn MH, Jansen P, Bakermans-Kranenburg M, Riem MME. Higher Levels of Harsh Parenting During the COVID-19 Lockdown in the Netherlands. *Child Maltreat*. Published online June 17, 2021:107755952110247. doi:[10.1177/10775595211024748](https://doi.org/10.1177/10775595211024748)
- Schokkenbroek JM, Anrijs S, Ponnet K, Hardyns W. Locked Down Together: Determinants of Verbal Partner Violence During the COVID-19 Pandemic. *Violence and Gender*. 2021;8(3):148-153. doi:[10.1089/vio.2020.0064](https://doi.org/10.1089/vio.2020.0064)
- Sediri S, Zgueb Y, Ouanes S, et al. Women's mental health: acute impact of COVID-19 pandemic on domestic violence. *Arch Womens Ment Health*. 2020;23(6):749-756. doi:[10.1007/s00737-020-01082-4](https://doi.org/10.1007/s00737-020-01082-4)
- Sharma P, Khokhar A. Domestic Violence and Coping Strategies Among Married Adults During Lockdown Due to Coronavirus Disease (COVID-19) Pandemic in India: A Cross-Sectional Study. *Disaster med public health prep*. Published online March 3, 2021:1-8. doi:[10.1017/dmp.2021.59](https://doi.org/10.1017/dmp.2021.59)
- shokair zeinab, Abo Hamza E. Family Violence and its Impact on Children's Mental Health During COVID-19 Pandemic. *International Journal of Instructional Technology and Educational Studies*. 2020;1(3):42-49. doi:[10.21608/ihites.2020.42946.1035](https://doi.org/10.21608/ihites.2020.42946.1035)
- Shrestha C, Ghimire C, Acharya S, Kc P, Singh S, Sharma P. Mental Wellbeing during the Lockdown Period following the COVID-19 Pandemic in Nepal: A Descriptive Cross-sectional Study. *J Nepal Med Assoc*. 2020;58(230). doi:[10.31729/jnma.5498](https://doi.org/10.31729/jnma.5498)
- Siegel A, Lahav Y. Emotion Regulation and Distress During the COVID-19 Pandemic: The Role of Childhood Abuse. *J Interpers Violence*. Published online June 4, 2021:088626052110219. doi:[10.1177/08862605211021968](https://doi.org/10.1177/08862605211021968)



- Spencer CM, Gimarc C, Durtschi J. COVID-19 Specific Risk Markers for Intimate Partner Violence Perpetration. *J Fam Viol*. Published online October 19, 2021. doi:[10.1007/s10896-021-00335-9](https://doi.org/10.1007/s10896-021-00335-9)
- Steinhoff A, Bechtiger L, Ribeaud D, et al. Self-Injury and Domestic Violence in Young Adults During the COVID-19 Pandemic: Trajectories, Precursors, and Correlates. *J Res Adolesc*. 2021;31(3):560-575. doi:[10.1111/jora.12659](https://doi.org/10.1111/jora.12659)
- Tadesse AW, Tarekegn SM, Wagaw GB, Muluneh MD, Kassa AM. Prevalence and Associated Factors of Intimate Partner Violence Among Married Women During COVID-19 Pandemic Restrictions: A Community-Based Study. *J Interpers Violence*. Published online December 8, 2020:088626052097622. doi:[10.1177/0886260520976222](https://doi.org/10.1177/0886260520976222)
- Tesfaw LM, Kassie AB, Flatie BT. Sexual Violence and Other Complications of Corona Virus in Amhara Metropolitan Cities, Ethiopia. *RMHP*. 2021;Volume 14:3563-3573. doi:[10.2147/RMHP.S297148](https://doi.org/10.2147/RMHP.S297148)
- Teshome A, Gudu W, Bekele D, Asfaw M, Enyew R, Compton SD. Intimate partner violence among prenatal care attendees amidst the COVID-19 crisis: The incidence in Ethiopia. *Int J Gynecol Obstet*. 2021;153(1):45-50. doi:[10.1002/ijgo.13566](https://doi.org/10.1002/ijgo.13566)
- Tierolf B, Geurts E, Steketee M. Domestic violence in families in the Netherlands during the coronavirus crisis: A mixed method study. *Child Abuse & Neglect*. 2021;116:104800. doi:[10.1016/j.chiabu.2020.104800](https://doi.org/10.1016/j.chiabu.2020.104800)
- Yamaoka Y, Hosozawa M, Sampei M, et al. Abusive and positive parenting behavior in Japan during the COVID-19 pandemic under the state of emergency. *Child Abuse & Neglect*. 2021;120:105212. doi:[10.1016/j.chiabu.2021.105212](https://doi.org/10.1016/j.chiabu.2021.105212)
- Yari A, Zahednezhad H, Gheshlagh RG, Kurdi A. Frequency and determinants of domestic violence against Iranian women during the COVID-19 pandemic: a national cross-sectional survey. *BMC Public Health*. 2021;21(1):1727. doi:[10.1186/s12889-021-11791-9](https://doi.org/10.1186/s12889-021-11791-9)
- Zhang H, Li Y, Shi R, Dong P, Wang W. Prevalence of Child Maltreatment during the COVID-19 Pandemic: A Cross-sectional Survey of Rural Hubei, China. *The British Journal of Social Work*. Published online August 25, 2021:bcab162. doi:[10.1093/bjsw/bcab162](https://doi.org/10.1093/bjsw/bcab162)
